# Supplementary material for: The Impact of Excluding Trials from Network Meta-Analyses – An Empirical Study
Source: PubMed Central journal article supplement (PMC5142775; doi:10.1371/journal.pone.0165889), 2016-12-07
Supplement: pone.0165889.s001.pdf [file pone.0165889.s001.pdf]

### AB approach

```
model{
  for(i in 1:nN) {
    p[i]<-phi(mu[t[i]]+ vi[s[i], t[i]])
    y[i]~dbin(p[i], n[i])
  }
  for(j in 1:nS){
    vi[j, 1:nT]~dmnorm(mn[1:nT], T[1:nT,1:nT])
  }

  T[1:nT, 1:nT]<-inverse(invT[ , ])
  for(j in 1:nT){
    for(k in 1:nT){
      invT[j, k]<-sigma2*pow(rho,step(abs(j-k)-0.5))
    }
  }

  sigma2<-sigma*sigma
  sigma~dunif(0,5)
  for (j in 1:nT){
    mu[j]~dnorm(0, 0.001)
    probt[j]<-phi(mu[j]/sqrt(1+invT[j, j]))
  }
  rho~dunif(0.01,1)

  for (j in 1:nT){
    OR[j,j]<-1
    for (k in (j+1):nT){
      OR[k, j] <- probt[k]/(1-probt[k])/probt[j]*(1-probt[j])
      OR[j, k] <- 1/OR[k, j]
    }
  }

  rk<- rank(probt) # the smaller the better
  for (k in 1:nT) {
    best[k]<-equals(rk[k],1)
  }

#   rk<- nT + 1 - rank(probt) # the largest the better
#   for (k in 1:nT) {
#     best[k]<-equals(rk[k],1)
#   }
}
```

```
### CB Approach
```

```
model{  
  for(i in 1:NS){  
    w[i,1] <-0  
    delta[i,t[i,1]]<-0  
    mu[i] ~ dnorm(0,0.1)  
  
    for(k in 1:na[i]){  
      r[i,k] ~ dbin(p[i,t[i,k]],n[i,k])  
      logit(p[i,t[i,k]])<-mu[i] + delta[i,t[i,k]]  
    }  
  
    for(k in 2:na[i]){  
      delta[i,t[i,k]] ~ dnorm(md[i,t[i,k]],taud[i,t[i,k]])  
      md[i,t[i,k]] <- d[t[i,k]] - d[t[i,1]] + sw[i,k]  
      taud[i,t[i,k]] <- tau *2*(k-1)/k  
      w[i,k] <- (delta[i,t[i,k]] - d[t[i,k]] + d[t[i,1]])  
      sw[i,k] <-sum(w[i,1:k-1])/(k-1)  
    }  
  }  
  
  d[1]<-0  
  for (k in 2:NT){d[k] ~ dnorm(0,.0001) }  
  
  sd~dunif(0,2)  
  tau<-1/pow(sd,2)
```

```
# pairwise ORs
```

```
for(j in 1:NT){  
  OR[j,j]<-1  
  for (k in (j+1):NT){  
    lor[k,j] <- d[k] - d[j]  
    log(OR[k,j]) <- lor[k,j]  
    OR[j, k] <- 1/OR[k, j]  
  }  
}  
}
```

```

### Inconsistency

model{

# likelihood

for (i in 1:nN) {
  p[i]<-phi(mu[t[i], group[i]] + v[s[i], group[i], t[i]])
  y[i]~dbin (p[i] , n[i])
}

# random effects

for (j in 1:nS){
  for(g in 1:n.group) {
    v[j,g,1:nT]~dmnorm(mn[1:nT], T[1:nT, 1:nT])
  }
}

T[1:nT, 1:nT]<-inverse(invT[ , ])
for(j in 1:nT){
  for(k in 1:nT){
    invT[j, k]<-sigma2*pow(rho,step(abs(j-k)-0.5))
  }
}
sigma2<-sigma*sigma

# priors

sigma~dunif(0,5)
rho~dunif(0.01,1)

for(k in 1:nT) {
  for(g in 1:n.group) {
    mu[k, g] ~ dnorm(0, 0.001)
  }
}

# Compute inconsistency between treatments 5 and 1
dis<-(mu[5,1]-mu[1,1])-(mu[5,3]-mu[1,2])

}

```
